# Supplementary material
Source: PubMed Central journal article supplement (PMC3839289)
Supplement: NIHMS508081-supplement-Supp_Fig_S1.pdf [file NIHMS508081-supplement-Supp_Fig_S1.pdf]

## Supplemental Figure 1

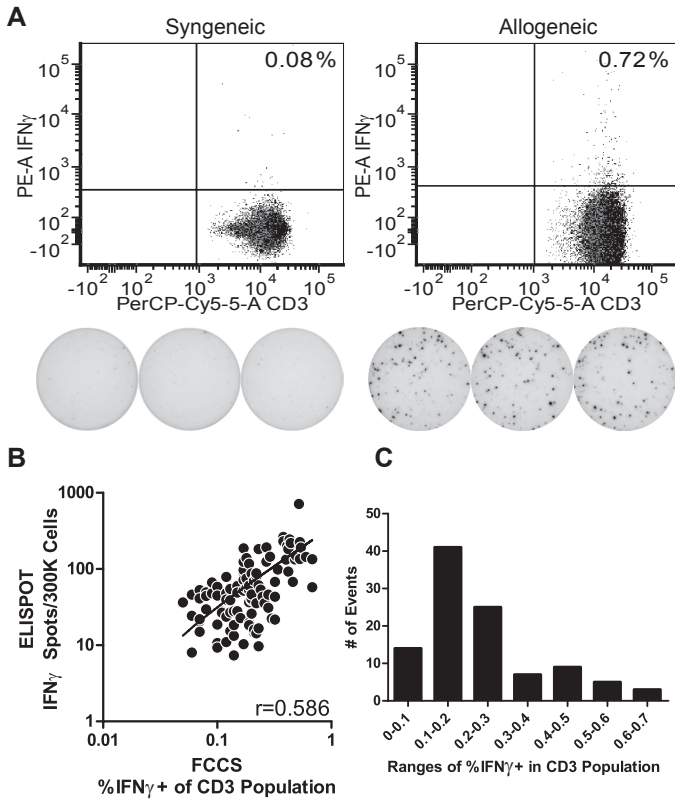

**Supplemental Figure 1.** Comparison of IFN $\gamma$  ELISPOT and Flow Cytometry Cytokine Secretion assays. Representative results of side by side IFN $\gamma$  FCCS assays (top) and IFN $\gamma$  ELISPOT assays (bottom) using syngeneic responder stimulator pair (left) and allogeneic responder stimulator pair (Right). Comparison of ELISPOT and FCCS assay results for 103 responder stimulator pairs with correlation coefficient shown in the lower right. C. Frequency distribution of FCCS assays (site 3) shows similar distribution to that found in ELISPOT assays (Fig 5. right panel).
